# Supplementary material for: CLDN6 Suppresses c–MYC–Mediated Aerobic Glycolysis to Inhibit Proliferation by TAZ in Breast Cancer
Source: MDPI journal article supplement (doi:10.3390/ijms23010129), 2021-12-23
Supplement: s1 [file s1]

Supplementary Figure S1

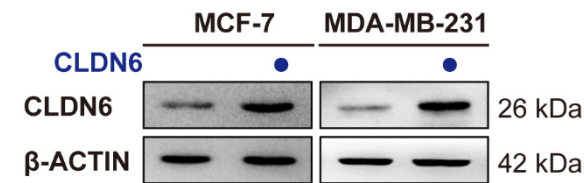

**Figure S1.** WB validation of CLDN6 overexpression in MCF-7 and MDA-MB-231

cells. **Supplementary Figure S2**

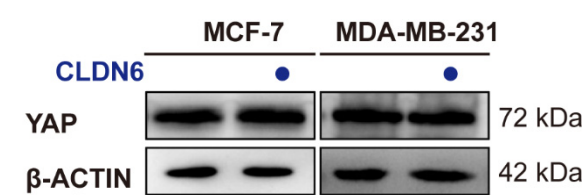

**Figure S2.** WB analysis of the effect of CLDN6 on YAP expression in MCF-7 and MDA-MB-231 cells.

**Supplementary Table S1** The first antibodies used in IHC

| Name  | Catalog Number | Manufacturer          | Dilution     |
|-------|----------------|-----------------------|--------------|
| CLDN6 | sc-393671      | Santa Cruz, USA       | 1:100        |
| TAZ   | OTI1H9         | Origene, USA          | 1:150        |
| c-MYC | RMA-0803       | MXB Biotechnology, CN | Ready to use |
| GLUT1 | 21829-1-AP     | Proteintech, CN       | 1:1000       |
| LDHA  | 19987-1-AP     | Proteintech, CN       | 1:100        |

**Supplementary Table S2** The primers used in RT-PCR

| Genes          | Primer Sequence                                                   |
|----------------|-------------------------------------------------------------------|
| $\beta$ -ACTIN | 5'-TCATGAAGTGTGACGTGGACATC-3'<br>5'-CAGGAGGAGCAATGATCTTGATCT-3'   |
| CLDN6          | 5'-TTCATCGGCAACAGCATCGT-3'<br>5'-GGTTATAGAAGTCCCGGATGA-3'         |
| c-MYC          | 5'-AGAGTCTGGATCACCTTCTGCTGGA-3'<br>5'-ACATTCTCCTCGGTGTCCGAGGAC-3' |
| GLUT1          | 5'-CAGGAGATGAAGGAAGAGAGTCG-3'<br>5'-CGAAGATGCTCGTGGAGTAATAG-3'    |
| LDHA           | 5'-CCAGTTTCCACCATGATTAAGGG-3'<br>5'-GAAGTCAGAGTCACCTTCACAAG-3'    |

**Supplementary Table S3** The first antibodies used in WB

| Name           | Catalog Number | Manufacturer    | Dilution |
|----------------|----------------|-----------------|----------|
| $\beta$ -ACTIN | 66009-1-Ig     | Proteintech, CN | 1:2000   |
| CLDN6          | sc-393671      | Santa Cruz, USA | 1:500    |
| c-MYC          | 10828-1-AP     | Proteintech, CN | 1:1000   |
| GLUT1          | 21829-1-AP     | Proteintech, CN | 1:1000   |
| LDHA           | 19987-1-AP     | Proteintech, CN | 1:2000   |
| TAZ            | A15806         | Abclonal, CN    | 1:1000   |
| YAP            | A19134         | Abclonal, CN    | 1:1000   |

**Supplementary Table S4** The first antibodies used in IF

| Name  | Catalog Number | Manufacturer    | Dilution |
|-------|----------------|-----------------|----------|
| CLDN6 | sc-393671      | Santa Cruz, USA | 1:100    |
| TAZ   | A15806         | Abclonal, CN    | 1:100    |
